# Supplementary material for: Airborne determination of the temporo-spatial distribution of benzene, toluene, nitrogen oxides and ozone in the boundary layer across Greater London, UK
Source: Copernicus journal article supplement (doi:10.5194/acp-15-5083-2015), 2015-05-05
Supplement: Supplementary file 1 [file acp-15-5083-2015-supplement.pdf]

Supplement of Atmos. Chem. Phys., 15, 5083–5097, 2015  
<http://www.atmos-chem-phys.net/15/5083/2015/>  
doi:10.5194/acp-15-5083-2015-supplement  
© Author(s) 2015. CC Attribution 3.0 License.

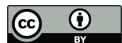

*Supplement of*

## **Airborne determination of the temporo-spatial distribution of benzene, toluene, nitrogen oxides and ozone in the boundary layer across Greater London, UK**

**M. D. Shaw et al.**

*Correspondence to:* C. N. Hewitt (n.hewitt@lancaster.ac.uk)

## Supplementary Material

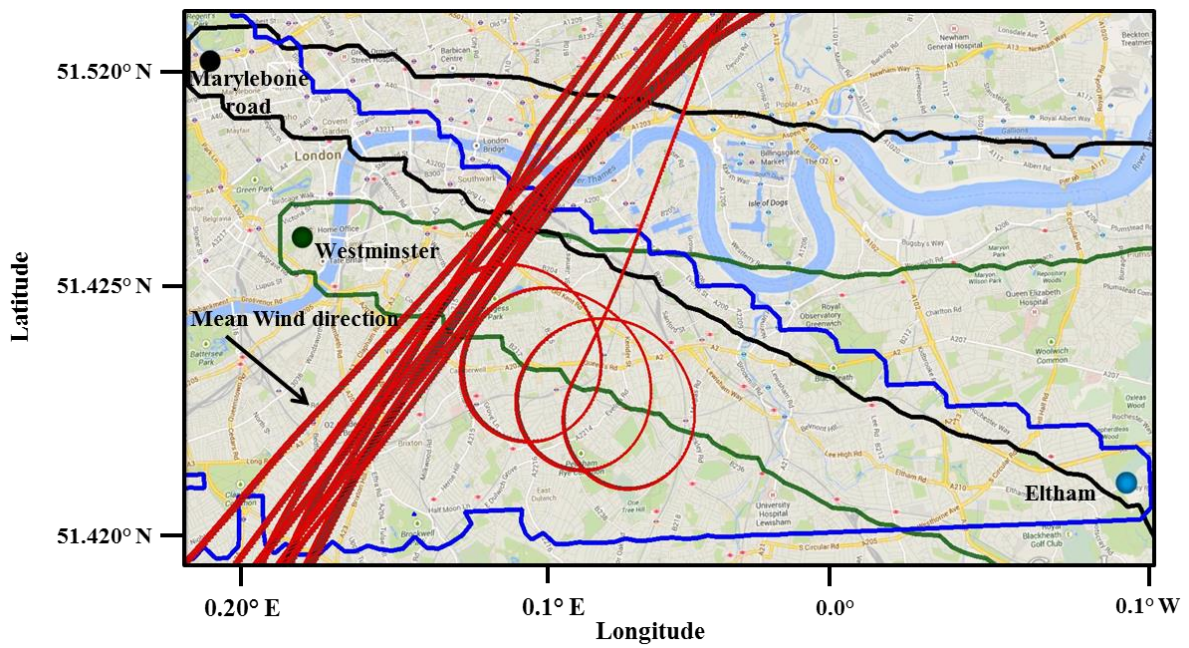

Figure S-1. Flight track and NOAA HYSPLIT particle dispersion plots for three LAQN ground monitoring sites located in Greater London during RF 5 (10:30 – 13:00 local time, 3/7/13).

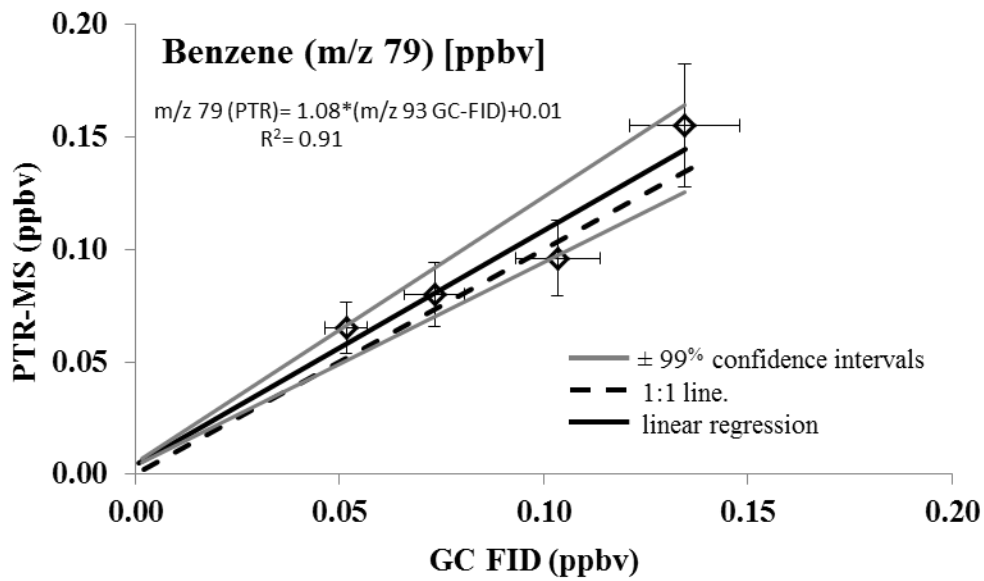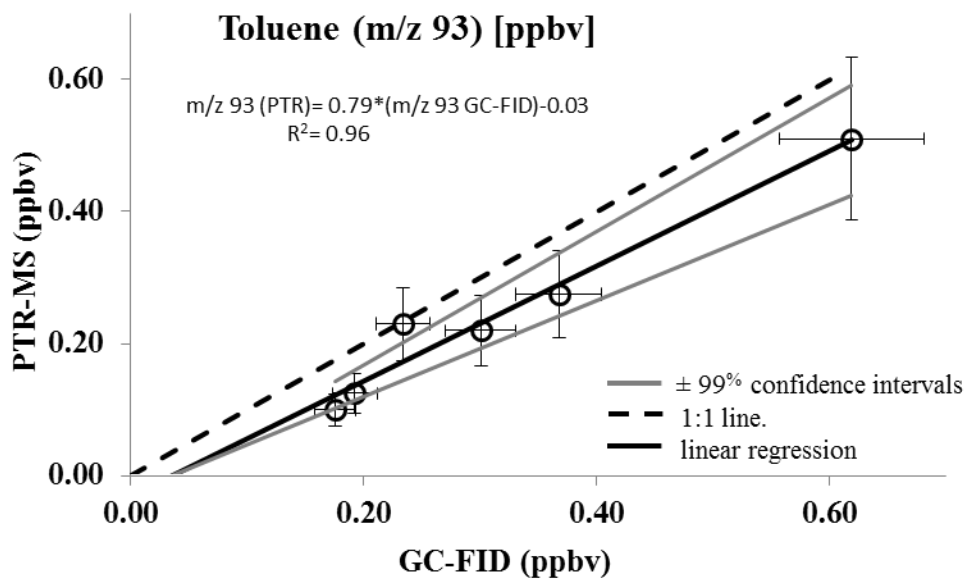

Figure S-2. Scatter plots of VOC concentrations (ppbv) (benzene and toluene) of PTR-MS against WAS TD-GC-FID measurements at  $360 \pm 10$  m a.g.l.
